# Supplementary material for: Complete mitochondrial genome of Perilla frutescens (Lamiaceae) insights into structure, Codon usage, repeats, and RNA editing
Source: Research Square preprint supplement (doi:10.21203/rs.3.rs-4003097/v1), 2024-03-18
Supplement: Supplementary file 1 [file 77c7f937a9ed5051e0b6c7c3.xlsx]

## Sheet: Supplementary Table S1
Supplementary Table S1: Dispersed repeats Statistics
NO.	site star	site end	site star	site end	length	type	p value	Fepeat type
1	107463	113008	216357	221902	5545	0	0	F
2	109734	112909	296376	299551	3175	0	0	F
3	218628	221803	296376	299551	3175	0	0	F
4	14340	14679	133126	133465	339	-2	1.04e-188	F
5	14432	14690	133218	133476	258	-3	8.99e-138	F
6	126223	126445	296143	296365	222	-1	3.7e-121	P
7	14488	14690	133274	133476	202	-2	1.12e-106	F
8	82302	82454	154531	154683	152	0	7.74e-82	F
9	35332	35478	126147	126293	146	0	3.17e-78	F
10	2970	3083	237081	237194	113	0	2.34e-58	P
11	14145	14233	268601	268689	88	0	2.63e-43	F
12	80465	80551	215039	215125	86	0	4.22e-42	P
13	112250	112334	224799	224883	84	0	6.75e-41	F
14	221144	221228	224799	224883	84	0	6.75e-41	F
15	224799	224883	298892	298976	84	0	6.75e-41	F
16	90110	90193	171222	171305	83	-1	6.72e-38	F
17	3087	3171	105807	105891	84	-3	1.74e-34	F
18	112293	112369	134109	134185	76	-1	1.01e-33	F
19	134109	134185	221187	221263	76	-1	1.01e-33	F
20	134109	134185	298935	299011	76	-1	1.01e-33	F
21	3093	3171	105813	105891	78	-2	7.47e-33	F
22	35408	35478	296295	296365	70	0	1.81e-32	P
23	231182	231262	249920	250000	80	-3	3.83e-32	P
24	231193	231262	249920	249989	69	0	7.24e-32	P
25	3103	3171	105823	105891	68	0	2.9e-31	F
26	194437	194504	200355	200422	67	-1	2.33e-28	F
27	21374	21436	73197	73259	62	0	1.19e-27	P
28	523	584	46705	46766	61	0	4.75e-27	F
29	131766	131828	192193	192255	62	-1	2.21e-25	F
30	3039	3104	224886	224951	65	-3	2.19e-23	P
31	117910	117969	231585	231644	59	-2	1.17e-21	F
32	200086	200138	210736	210788	52	0	1.24e-21	P
33	3053	3104	224886	224937	51	0	4.98e-21	P
34	126394	126445	296143	296194	51	0	4.98e-21	P
35	11063	11113	189317	189367	50	0	1.99e-20	F
36	92337	92386	234289	234338	49	0	7.96e-20	F
37	113335	113382	247927	247974	47	0	1.27e-18	F
38	62809	62862	90404	90457	53	-2	3.86e-18	P
39	41238	41284	269363	269409	46	0	5.1e-18	F
40	62128	62174	143498	143544	46	0	5.1e-18	F
41	229733	229782	287824	287873	49	-1	1.17e-17	F
42	11136	11181	291027	291072	45	0	2.04e-17	F
43	131785	131828	192212	192255	43	0	3.26e-16	F
44	204326	204372	254957	255003	46	-1	7.03e-16	P
45	35424	35476	147826	147878	52	-3	7.42e-16	P
46	126239	126291	147826	147878	52	-3	7.42e-16	P
47	147826	147878	296297	296349	52	-3	7.42e-16	F
48	62817	62862	90404	90449	45	-1	2.75e-15	P
49	3154	3195	126059	126100	41	0	5.22e-15	F
50	134109	134150	224842	224883	41	0	5.22e-15	F
51	14856	14906	106627	106677	50	-3	1.05e-14	P
52	170374	170418	215623	215667	44	-1	1.08e-14	P
53	234750	234796	248618	248664	46	-2	4.75e-14	P
54	3124	3163	254880	254919	39	0	8.35e-14	P
55	7991	8030	107345	107384	39	0	8.35e-14	P
56	105844	105883	254880	254919	39	0	8.35e-14	P
57	35431	35476	147826	147871	45	-2	1.82e-13	P
58	126246	126291	147826	147871	45	-2	1.82e-13	P
59	165296	165341	186176	186221	45	-2	1.82e-13	F
60	170380	170418	215623	215661	38	0	3.34e-13	P
61	14907	14954	106585	106632	47	-3	5.58e-13	P
62	49574	49615	127012	127053	41	-1	6.42e-13	F
63	14862	14906	106627	106671	44	-2	6.94e-13	P
64	2953	2990	261297	261334	37	0	1.34e-12	P
65	11170	11207	256937	256974	37	0	1.34e-12	F
66	147838	147878	296309	296349	40	-1	2.51e-12	F
67	11947	11983	281469	281505	36	0	5.34e-12	F
68	106585	106621	133716	133752	36	0	5.34e-12	P
69	67738	67773	249486	249521	35	0	2.14e-11	P
70	144309	144344	270033	270068	35	0	2.14e-11	F
71	224907	224951	237081	237125	44	-3	2.92e-11	F
72	202758	202792	247836	247870	34	0	8.55e-11	F
73	76174	76207	235799	235832	33	0	3.42e-10	F
74	14915	14954	106585	106624	39	-2	5.57e-10	P
75	59569	59608	249861	249900	39	-2	5.57e-10	P
76	14107	14143	268561	268597	36	-1	5.77e-10	F
77	208771	208803	222499	222531	32	0	1.37e-09	P
78	165306	165341	186186	186221	35	-1	2.24e-09	F
79	609	640	16078	16109	31	0	5.47e-09	F
80	8029	8060	106863	106894	31	0	5.47e-09	P
81	14076	14107	268531	268562	31	0	5.47e-09	F
82	147441	147472	148334	148365	31	0	5.47e-09	F
83	160279	160310	271858	271889	31	0	5.47e-09	F
84	192189	192229	213166	213206	40	-3	5.57e-09	F
85	14918	14955	133716	133753	37	-2	8.01e-09	F
86	165253	165290	186133	186170	37	-2	8.01e-09	F
87	99774	99808	110906	110940	34	-1	8.72e-09	P
88	99774	99808	219800	219834	34	-1	8.72e-09	P
89	99774	99808	297548	297582	34	-1	8.72e-09	P
90	116942	116976	232234	232268	34	-1	8.72e-09	P
91	106631	106661	133688	133718	30	0	2.19e-08	P
92	167969	167999	270673	270703	30	0	2.19e-08	P
93	105600	105636	171457	171493	36	-2	3.03e-08	F
94	112970	113006	202654	202690	36	-2	3.03e-08	F
95	174354	174390	223326	223362	36	-2	3.03e-08	P
96	202654	202690	221864	221900	36	-2	3.03e-08	F
97	649	687	284510	284548	38	-3	7.61e-08	P
98	75832	75861	111402	111431	29	0	8.76e-08	P
99	75832	75861	220296	220325	29	0	8.76e-08	P
100	75832	75861	298044	298073	29	0	8.76e-08	P
101	134485	134514	168819	168848	29	0	8.76e-08	P
102	247825	247854	290007	290036	29	0	8.76e-08	P
103	157991	158026	241220	241255	35	-2	1.14e-07	P
104	41417	41449	291780	291812	32	-1	1.31e-07	F
105	81969	82006	284449	284486	37	-3	2.8e-07	P
106	26710	26738	26710	26738	28	0	3.5e-07	P
107	37012	37040	228126	228154	28	0	3.5e-07	F
108	116949	116976	232234	232261	27	0	1.4e-06	P
109	125458	125485	194517	194544	27	0	1.4e-06	P
110	112595	112628	151754	151787	33	-2	1.63e-06	P
111	151754	151787	221489	221522	33	-2	1.63e-06	P
112	151754	151787	299237	299270	33	-2	1.63e-06	P
113	224961	224994	250011	250044	33	-2	1.63e-06	F
114	110963	110993	200460	200490	30	-1	1.97e-06	F
115	174360	174390	223326	223356	30	-1	1.97e-06	P
116	200460	200490	219857	219887	30	-1	1.97e-06	F
117	200460	200490	297605	297635	30	-1	1.97e-06	F
118	51145	51171	281994	282020	26	0	5.6e-06	P
119	129250	129276	131578	131604	26	0	5.6e-06	F
120	165315	165341	186195	186221	26	0	5.6e-06	F
121	3303	3335	149094	149126	32	-2	6.11e-06	P
122	145403	145435	145634	145666	32	-2	6.11e-06	F
123	47169	47198	55778	55807	29	-1	7.62e-06	F
124	81486	81515	224962	224991	29	-1	7.62e-06	P
125	110723	110757	280725	280759	34	-3	1.38e-05	P
126	113640	113674	152287	152321	34	-3	1.38e-05	P
127	113871	113905	152227	152261	34	-3	1.38e-05	P
128	134258	134292	250010	250044	34	-3	1.38e-05	F
129	219617	219651	280725	280759	34	-3	1.38e-05	P
130	280725	280759	297365	297399	34	-3	1.38e-05	P
131	15516	15541	90047	90072	25	0	2.24e-05	P
132	81486	81511	203460	203485	25	0	2.24e-05	F
133	158171	158196	234744	234769	25	0	2.24e-05	F
134	167950	167975	168157	168182	25	0	2.24e-05	P
135	184769	184794	257505	257530	25	0	2.24e-05	P
136	184789	184814	240587	240612	25	0	2.24e-05	F
137	204347	204372	254957	254982	25	0	2.24e-05	P
138	14868	14899	133684	133715	31	-2	2.29e-05	F
139	33120	33151	49596	49627	31	-2	2.29e-05	F
140	105919	105950	132391	132422	31	-2	2.29e-05	P
141	200443	200474	205707	205738	31	-2	2.29e-05	P
142	203458	203489	224962	224993	31	-2	2.29e-05	P
143	235563	235594	241272	241303	31	-2	2.29e-05	P
144	16762	16790	192974	193002	28	-1	2.94e-05	P
145	81393	81421	260593	260621	28	-1	2.94e-05	F
146	105608	105636	171465	171493	28	-1	2.94e-05	F
147	5776	5806	62133	62163	30	-2	8.57e-05	P
148	5776	5806	143503	143533	30	-2	8.57e-05	P
149	192199	192229	213176	213206	30	-2	8.57e-05	F
150	69835	69859	274579	274603	24	0	8.97e-05	F
151	94597	94621	106201	106225	24	0	8.97e-05	F
152	164878	164902	202816	202840	24	0	8.97e-05	P
153	169874	169898	188373	188397	24	0	8.97e-05	P
154	172935	172959	202902	202926	24	0	8.97e-05	P
155	193163	193187	194308	194332	24	0	8.97e-05	P
156	234716	234740	248669	248693	24	0	8.97e-05	P
157	14928	14955	133726	133753	27	-1	0.000113	F
158	112979	113006	202663	202690	27	-1	0.000113	F
159	113034	113061	278190	278217	27	-1	0.000113	P
160	202663	202690	221873	221900	27	-1	0.000113	F
161	117945	117977	231620	231652	32	-3	0.000183	F
162	174194	174226	200494	200526	32	-3	0.000183	P
163	658	687	284510	284539	29	-2	0.00032	P
164	121662	121691	155207	155236	29	-2	0.00032	F
165	70760	70783	223493	223516	23	0	0.000359	F
166	112605	112628	151754	151777	23	0	0.000359	P
167	3057	3083	276347	276373	26	-1	0.000437	P
168	14928	14954	106585	106611	26	-1	0.000437	P
169	16688	16714	18762	18788	26	-1	0.000437	F
170	19672	19698	75796	75822	26	-1	0.000437	P
171	113060	113086	278113	278139	26	-1	0.000437	P
172	151155	151181	167887	167913	26	-1	0.000437	F
173	224907	224933	276347	276373	26	-1	0.000437	F
174	237081	237107	276347	276373	26	-1	0.000437	F
175	23382	23413	233524	233555	31	-3	0.000664	P
176	110739	110770	280712	280743	31	-3	0.000664	P
177	131766	131797	213170	213201	31	-3	0.000664	F
178	219633	219664	280712	280743	31	-3	0.000664	P
179	240461	240492	260139	260170	31	-3	0.000664	P
180	280712	280743	297381	297412	31	-3	0.000664	P
181	66206	66234	66207	66235	28	-2	0.00119	F
182	82345	82373	224955	224983	28	-2	0.00119	P
183	154574	154602	224955	224983	28	-2	0.00119	P
184	235594	235622	241250	241278	28	-2	0.00119	P
185	3051	3073	90404	90426	22	0	0.00143	F
186	8261	8283	126795	126817	22	0	0.00143	P
187	81491	81513	82342	82364	22	0	0.00143	F
188	81491	81513	154571	154593	22	0	0.00143	F
189	81493	81515	229837	229859	22	0	0.00143	P
190	90404	90426	237091	237113	22	0	0.00143	P
191	97875	97897	142111	142133	22	0	0.00143	P
192	105928	105950	132391	132413	22	0	0.00143	P
193	184746	184768	257532	257554	22	0	0.00143	P
194	186132	186154	254918	254940	22	0	0.00143	P
195	244450	244472	244450	244472	22	0	0.00143	P
196	248776	248798	248776	248798	22	0	0.00143	F
197	79997	80022	82342	82367	25	-1	0.00168	F
198	79997	80022	154571	154596	25	-1	0.00168	F
199	200449	200474	205707	205732	25	-1	0.00168	P
200	235569	235594	241272	241297	25	-1	0.00168	P
201	14936	14966	133734	133764	30	-3	0.0024	F
202	90461	90491	112287	112317	30	-3	0.0024	P
203	90461	90491	221181	221211	30	-3	0.0024	P
204	90461	90491	224836	224866	30	-3	0.0024	P
205	90461	90491	298929	298959	30	-3	0.0024	P
206	110965	110995	205689	205719	30	-3	0.0024	P
207	131772	131802	213176	213206	30	-3	0.0024	F
208	205689	205719	219859	219889	30	-3	0.0024	P
209	205689	205719	297607	297637	30	-3	0.0024	P
210	62885	62912	81489	81516	27	-2	0.00443	P
211	112540	112567	249877	249904	27	-2	0.00443	F
212	221434	221461	249877	249904	27	-2	0.00443	F
213	249877	249904	299182	299209	27	-2	0.00443	F
214	21177	21198	114647	114668	21	0	0.00574	P
215	26689	26710	148822	148843	21	0	0.00574	F
216	81494	81515	224962	224983	21	0	0.00574	P
217	98517	98538	141337	141358	21	0	0.00574	P
218	113391	113412	247974	247995	21	0	0.00574	F
219	115604	115625	256238	256259	21	0	0.00574	F
220	154818	154839	165417	165438	21	0	0.00574	P
221	158005	158026	241220	241241	21	0	0.00574	P
222	215259	215280	215259	215280	21	0	0.00574	F
223	224962	224983	229837	229858	21	0	0.00574	F
224	236780	236801	248030	248051	21	0	0.00574	P
225	253278	253299	266526	266547	21	0	0.00574	F
226	78041	78065	181008	181032	24	-1	0.00646	F
227	79995	80019	81489	81513	24	-1	0.00646	F
228	14259	14288	133051	133080	29	-3	0.00864	F
229	64448	64477	167950	167979	29	-3	0.00864	F
230	81486	81515	250012	250041	29	-3	0.00864	P
231	31429	31455	224086	224112	26	-2	0.0164	P
232	54412	54438	80006	80032	26	-2	0.0164	F
233	95044	95070	151776	151802	26	-2	0.0164	P
234	95095	95121	190254	190280	26	-2	0.0164	F
235	113655	113681	152280	152306	26	-2	0.0164	P
236	119903	119929	119903	119929	26	-2	0.0164	P
237	123939	123965	202175	202201	26	-2	0.0164	F
238	139235	139261	139235	139261	26	-2	0.0164	F
239	156986	157012	228031	228057	26	-2	0.0164	P
240	159717	159743	235493	235519	26	-2	0.0164	P
241	167533	167559	242569	242595	26	-2	0.0164	P
242	253361	253387	254479	254505	26	-2	0.0164	F
243	16694	16714	18768	18788	20	0	0.023	F
244	40476	40496	158655	158675	20	0	0.023	P
245	43834	43854	224871	224891	20	0	0.023	F
246	47307	47327	145904	145924	20	0	0.023	P
247	52031	52051	89441	89461	20	0	0.023	F
248	61871	61891	205839	205859	20	0	0.023	F
249	64457	64477	167959	167979	20	0	0.023	F
250	76946	76966	221953	221973	20	0	0.023	P
251	82342	82362	203465	203485	20	0	0.023	F
252	82344	82364	229839	229859	20	0	0.023	P
253	90406	90426	224917	224937	20	0	0.023	P
254	109346	109366	122897	122917	20	0	0.023	F
255	110857	110877	232380	232400	20	0	0.023	F
256	113041	113061	278190	278210	20	0	0.023	P
257	122897	122917	218240	218260	20	0	0.023	F
258	133780	133800	133834	133854	20	0	0.023	F
259	154571	154591	203465	203485	20	0	0.023	F
260	154573	154593	229839	229859	20	0	0.023	P
261	157252	157272	157252	157272	20	0	0.023	F
262	160340	160360	160385	160405	20	0	0.023	F
263	219751	219771	232380	232400	20	0	0.023	F
264	231301	231321	270662	270682	20	0	0.023	P
265	232380	232400	297499	297519	20	0	0.023	F
266	237174	237194	261297	261317	20	0	0.023	F
267	239143	239163	251600	251620	20	0	0.023	F
268	9078	9101	226127	226150	23	-1	0.0247	P
269	21807	21830	227690	227713	23	-1	0.0247	P
270	52013	52036	209177	209200	23	-1	0.0247	P
271	59564	59587	265480	265503	23	-1	0.0247	P
272	61870	61893	158169	158192	23	-1	0.0247	P
273	90461	90484	134110	134133	23	-1	0.0247	P
274	102125	102148	267168	267191	23	-1	0.0247	P
275	112350	112373	134166	134189	23	-1	0.0247	F
276	131484	131507	191340	191363	23	-1	0.0247	F
277	134166	134189	221244	221267	23	-1	0.0247	F
278	134166	134189	298992	299015	23	-1	0.0247	F
279	151809	151832	265485	265508	23	-1	0.0247	P
280	158146	158169	234683	234706	23	-1	0.0247	F
281	203467	203490	229836	229859	23	-1	0.0247	P
282	222298	222321	222869	222892	23	-1	0.0247	F
283	8308	8336	126742	126770	28	-3	0.031	P
284	11539	11567	152936	152964	28	-3	0.031	F
285	26150	26178	117627	117655	28	-3	0.031	F
286	31031	31059	192554	192582	28	-3	0.031	P
287	32979	33007	191339	191367	28	-3	0.031	P
288	43816	43844	62797	62825	28	-3	0.031	F
289	62802	62830	105809	105837	28	-3	0.031	P
290	79995	80023	250010	250038	28	-3	0.031	P
291	95050	95078	151768	151796	28	-3	0.031	P
292	133762	133790	133771	133799	28	-3	0.031	F
293	168158	168186	171098	171126	28	-3	0.031	F

## Sheet: Supplementary Table S2
Supplementary Table S2: Tandem repeat sequences Statistics.
No.	Star	end	Repeat Sequence
1	21278	21311	GTATACCAGCTGCTCTA	GTATACCAGCTGCTCTAGTATACCTGCTGCTCTA
2	53833	53865	AATATATAAATCGTCTG	AATATTAATATCGTCTGAATATATAAATCGTCT
3	80753	80800	ACACCAATGGATAGACTGATAT	ACACTAATGGATAGATTGACTATACACCAATGGATAGACTGTATACAC
4	80743	80802	GACTGATACACACCAATGGATA	GACTGAATTCACACTAATGGATAGATTGACTATACACCAATGGATAGACTGTATACACAC
5	164017	164052	TAGGTTTGGTTACAGGAAT	TAGGTTTGGTTACAGGAATTAGGTTGGTTATAGGAA
6	276757	276792	CAACAGGGGAACTAAAG	CAACAGTGGAACTAAAGCAACAGGGGAACTAAAGCA

## Sheet: Supplementary Table S3
Supplementary Table S3: The distribution of RNA editing sites in the mt PCGs of P. frutescens.
Organelle	Start	End			Location	Organelle	Start	End	Location
Mitochondrion	12870	13309	-	12870-13309	IGS(cox1,rps10)	Chloroplast	4996	4542	rps11
Mitochondrion	177936	177964	-	177936-177964	trnQ-UUG	Chloroplast	9535	9563	psbN
Mitochondrion	253110	253151	-	253110-253151	IGS(rrn18,apt9)	Chloroplast	9588	9547	psbN
Mitochondrion	182843	182970	-	182843-182970	IGS(nad4L,trnM-CAU)	Chloroplast	11205	11079	psbB
Mitochondrion	89946	90005	-	89946-90005	IGS(nad1,trnM-CAU)	Chloroplast	12445	12381	clpP
Mitochondrion	113039	113102	-	113039-113102	trnP-UGG	Chloroplast	17133	17071	trnP-UGG
Mitochondrion	61478	61839	-	61478-61839	trnW-CCA	Chloroplast	17393	17004	trnP-UGG-trnW-CCA
Mitochondrion	135672	135732	-	135672-135732	IGS(nad5,atp1)	Chloroplast	18978	18915	psbE
Mitochondrion	207097	207908	-	207097-207908	IGS(nad5,atp7)	Chloroplast	20956	20177	petA (partical:50%)
Mitochondrion	153417	153443	-	153417-153443	IGS(atp1,trnC-GCA)	Chloroplast	25649	25675	accD
Mitochondrion	66327	66356	-	66327-66356	IGS(trnK-UUU,ccmB)	Chloroplast	30832	30803	IGS(atpB-atpE)
Mitochondrion	176837	176916	-	176837-176916	trnM-CAU	Chloroplast	31575	31496	trnM-CAU
Mitochondrion	113370	113439	-	113370-113439	trnF-GAA	Chloroplast	35768	35835	trnF-GAA
Mitochondrion	21605	21782	-	21605-21782	IGS(trnS-GGA,rpl10)	Chloroplast	38044	38236	rps4
Mitochondrion	21790	21964	-	21790-21964	trnS-GGA	Chloroplast	38740	38918	trnS-GGA
Mitochondrion	27054	27092	-	27054-27092	rrn18(partical:0.52%)	Chloroplast	40447	40484	ycf3(partical:3.80%)
Mitochondrion	75879	75918	-	75879-75918	IGS(ccmB,nad1)	Chloroplast	40447	40485	ycf3(partical:3.96%)
Mitochondrion	60353	60399	-	60353-60399	IGS(rpl5,nad5)	Chloroplast	40449	40495	ycf3(partical:4.32%)
Mitochondrion	93685	93712	-	93685-93712	IGS(nad2,atp6)	Chloroplast	43087	43060	Psa(partical:0.59%)
Mitochondrion	188402	188531	-	188402-188531	IGS(atp4,rpl6)	Chloroplast	44882	44745	PsaB(partical:1.39%)
Mitochondrion	227638	227713	-	227638-227713	trnS-UGA(partical:42.92%)	Chloroplast	48480	48551	trnS-UGA
Mitochondrion	21803	21830	-	21803-21830	trnS-GGA	Chloroplast	48556	48529	nad5-exon8
Mitochondrion	39825	39885	-	39825-39885	rrn23S	Chloroplast	49228	49287	rrn26
Mitochondrion	176845	176904	-	176845-176904	trnM-CAU	Chloroplast	52609	52551	nad5-exon4
Mitochondrion	22441	22607	-	22441-22607	trnD-GUC	Chloroplast	53621	53459	rrn26
Mitochondrion	17794	18245	-	17794-18245	IGS(rpl10,trnS-GGA)	Chloroplast	58082	57551	rrn26
Mitochondrion	147767	148225	-	147767-148225	atp1(partical:30.07%)	Chloroplast	73184	72726	rrn18
Mitochondrion	270187	270270	-	270187-270270	trnS-GCU	Chloroplast	75371	75288	nad5-exon6
Mitochondrion	21801	21888	-	21801-21888	trnS-GGA	Chloroplast	75382	75294	rrn26
Mitochondrion	197786	197839	-	197786-197839	trnF-GAA	Chloroplast	76690	76637	trnF-GAA
Mitochondrion	103578	104454	-	103578-104454	IGS(nad2,atp6)	Chloroplast	82432	83308	IGS(rrn26,trnT-TGT)
Mitochondrion	241607	241685	-	241607-241685	trnH-GUG	Chloroplast	83625	83703	IGS(trnP-TGG-2,nad9)
Mitochondrion	46826	46970	-	46826-46970	IGS(rpl5,nad5)	Chloroplast	84304	84448	IGS(atp9,nad1)
Mitochondrion	40131	40543	-	40131-40543	trnM-CAU	Chloroplast	85442	85854	rrn18
Mitochondrion	61992	62111	-	61992-62111	IGS(trnW-CCA,nad9)	Chloroplast	88845	88971	rrn26
Mitochondrion	27059	27094	-	27059-27094	nad4(partical:0.62%)	Chloroplast	97893	97858	trnQ-TTG
Mitochondrion	60353	60394	-	60353-60394	IGS(rpl5,nad5)	Chloroplast	97895	97854	nad5-exon14
Mitochondrion	59571	59595	-	59571-59595	IGS(rpl5,nad5)	Chloroplast	99750	99774	nad5-exon9
Mitochondrion	249875	249935	-	249875-249935	rrn18partical:3.54%)	Chloroplast	99774	99714	IGS(nad6,trnW-CCA)
Mitochondrion	248836	249700	-	248836-249700	rrn18(partical:42.92%)	Chloroplast	100782	99908	rrn26
Mitochondrion	248183	248461	-	248183-248461	rrn18partical:14.54%)	Chloroplast	101089	100809	trnN-GTT(partical:87.80%)
Mitochondrion	248039	248089	-	248039-248089	rrn18(partical:42.92%)	Chloroplast	101186	101136	trnS-GCT,trnN-ATT-intron1,trnN-ATT-exon1,trnN-ATT-exon2
Mitochondrion	167749	167823	-	167749-167823	rrn26(partical:1.54%)	Chloroplast	103813	103887	IGS(nad9,trnM-CAT-2)
Mitochondrion	168343	168439	-	168343-168439	rrn26(partical:2.83%)	Chloroplast	104070	104166	ccmC
Mitochondrion	168625	168789	-	168625-168789	IGS(nad1,trnM-CAU)	Chloroplast	104318	104480	rrn26
Mitochondrion	168923	169131	-	168923-169131	rrn26(partical:6.39%)	Chloroplast	104626	104832	IGS(nad4,trnD-GTC)
Mitochondrion	169765	170219	-	169765-170219	rrn26(partical:15.39%)	Chloroplast	105286	105742	rrn18
Mitochondrion	170353	170878	-	170353-170878	rrn26(partical:15.39%)	Chloroplast	105888	106414	IGS(rrn26,trnT-TGT)
Mitochondrion	158604	158686	-	158604-158686	trnN-GUU	Chloroplast	107996	107914	IGS(trnP-TGG-2,nad9)
Mitochondrion	130818	130897	-	130818-130897	nad5(partical:2.04%)	Chloroplast	110751	110830	IGS(nad9,trnM-CAT-2)
Mitochondrion	27059	27094	-	27059-27094	nad4(partical:0.62%)	Chloroplast	118956	118921	IGS(atp9,nad1)
Mitochondrion	60349	60391	-	60349-60391	IGS(rpl5,nad5)	Chloroplast	118963	118920	nad5-exon15
Mitochondrion	210144	210183	-	210144-210183	nad7(partical:1.22%)	Chloroplast	120632	120671	nad5-exon10
Mitochondrion	158604	158686	-	158604-158686	trnN-GUU	Chloroplast	128302	128384	IGS(rrn26,trnT-TGT)
Mitochondrion	170353	170878	-	170353-170878	rrn26(partical:15.39%)	Chloroplast	130410	129884	rrn26
Mitochondrion	169765	170219	-	169765-170219	rrn26(partical:15.39%)	Chloroplast	131012	130556	atp1
Mitochondrion	168923	169131	-	168923-169131	rrn26(partical:6.39%)	Chloroplast	131672	131466	rps12
Mitochondrion	168625	168789	-	168625-168789	IGS(nad1,trnM-CAU)	Chloroplast	131980	131818	IGS(rrn26,trnT-TGT)
Mitochondrion	168343	168439	-	168343-168439	rrn26(partical:2.83%)	Chloroplast	132228	132132	ccmC(partical:17.72%)
Mitochondrion	167749	167823	-	167749-167823	rrn26(partical:1.54%)	Chloroplast	132485	132411	rrn18
Mitochondrion	248039	248089	-	248039-248089	rrn18(partical:42.92%)	Chloroplast	135112	135162	trnS-GCT(partical:10.39%),trnN-ATT-intron1(partical:3.90%),trnN-ATT-exon1(partical:41.56%),trnN-ATT-exon2(partical:46.75%)
Mitochondrion	248183	248461	-	248183-248461	rrn18partical:14.54%)	Chloroplast	135209	135489	IGS(cox2,nad1)
Mitochondrion	248836	249700	-	248836-249700	rrn18(partical:42.92%)	Chloroplast	135516	136390	IGS(rps3,cob)
Mitochondrion	249875	249935	-	249875-249935	rrn18partical:3.54%)	Chloroplast	136524	136584	IGS(rrn26,trnT-TGT)
Mitochondrion	59571	59595	-	59571-59595	IGS(rpl5,nad5)	Chloroplast	136548	136524	nad5-exon11
Mitochondrion	60353	60394	-	60353-60394	IGS(rpl5,nad5)	Chloroplast	138403	138444	nad5-exon16
Mitochondrion	27059	27094	-	27059-27094	nad4(partical:0.62%)	Chloroplast	138405	138440	nad5-exon2
Mitochondrion	61992	62111	-	61992-62111	IGS(trnW-CCA,nad9)	Chloroplast	147453	147327	rrn18
Mitochondrion	40131	40543	-	40131-40543	trnM-CAU	Chloroplast	150856	150444	trnW-CCA(partical:17.70%),trnP-TGG-2(partical:17.70%)
Mitochondrion	46826	46970	-	46826-46970	IGS(rpl5,nad5)	Chloroplast	151994	151850	trnD-GTC

## Sheet: Supplementary Table S4
Supplementary Table S4: RNA editor Statistics.
Gene	Base	Aa	Triplet pos	Bases	Codon	Aa Change	Label
cox1	3397	81	2	C→U	UCU→UUU	S→F	cox1eU3397SF
cox1	3409	85	2	C→U	UCU→UUU	S→F	cox1eU3409SF
cox1	3607	151	2	C→U	UCU→UUU	S→F	cox1eU3607SF
cox1	3670	172	2	C→U	UCC→UUC	S→F	cox1eU3670SF
cox1	3706	184	2	C→U	UCA→UUA	S→L	cox1eU3706SL
cox1	3745	197	2	C→U	CCA→CUA	P→L	cox1eU3745PL
cox1	3870	239	1	C→U	CGG→UGG	R→W	cox1eU3870RW
cox1	4877	12	2	C→U	UCC→UUC	S→F	cox1eU4877SF
cox1	5302	154	1	C→U	CAC→UAC	H→Y	cox1eU5302HY
cox1	5521	227	1	C→U	CGU→UGU	R→C	cox1eU5521RC
cox1	5549	236	2	C→U	UCA→UUA	S→L	cox1eU5549SL
cox1	5605	255	1	C→U	CCA→UCA	P→S	cox1eU5605PS
cox1	5615	258	2	C→U	CCG→CUG	P→L	cox1eU5615PL
rpl10	14623	87	2	U→C	CUU→CCU	L→P	ArthMp080eC14623LP
rpl10	14734	50	2	U→C	UUG→UCG	L→S	ArthMp080eC14734LS
rpl10	14735	50	1	C→U	CUG→UUG	L→L	ArthMp080eU14735LL
rpl10	14756	43	1	U→C	UUU→CUU	F→L	ArthMp080eC14756FL
rpl10	14801	28	1	C→U	CCA→UCA	P→S	ArthMp080eU14801PS
rpl10	14860	8	2	U→C	UUU→UCU	F→S	ArthMp080eC14860FS
rpl10	14861	8	1	C→U	CUU→UUU	L→F	ArthMp080eU14861LF
atp6-2	14867	30	1	U→C	UUC→CUC	F→L	atp6-2eC14867FL
atp6-2	14924	11	1	U→C	UUU→CUU	F→L	atp6-2eC14924FL
nad4	25392	22	2	C→U	ACU→AUU	T→I	nad4eU25392TI
nad4	25395	23	2	C→U	CCU→CUU	P→L	nad4eU25395PL
nad4	25425	33	2	C→U	CCG→CUG	P→L	nad4eU25425PL
nad4	25472	49	1	C→U	CCC→UCC	P→S	nad4eU25472PS
nad4	25476	50	2	C→U	CCU→CUU	P→L	nad4eU25476PL
nad4	25484	53	1	C→U	CGG→UGG	R→W	nad4eU25484RW
nad4	25499	58	1	C→U	CCU→UCU	P→S	nad4eU25499PS
nad4	25515	63	2	C→U	UCU→UUU	S→F	nad4eU25515SF
nad4	25680	118	2	C→U	ACA→AUA	T→I	nad4eU25680TI
nad4	25686	120	2	C→U	UCU→UUU	S→F	nad4eU25686SF
nad4	25694	123	1	C→U	CGU→UGU	R→C	nad4eU25694RC
nad4	25734	136	2	C→U	CCU→CUU	P→L	nad4eU25734PL
nad4	25751	142	1	C→U	CUU→UUU	L→F	nad4eU25751LF
nad4	25767	147	2	C→U	CCA→CUA	P→L	nad4eU25767PL
nad4	27322	49	2	C→U	UCA→UUA	S→L	nad4eU27322SL
nad4	27373	66	2	C→U	UCU→UUU	S→F	nad4eU27373SF
nad4	27481	102	2	C→U	CCU→CUU	P→L	nad4eU27481PL
nad4	27550	125	2	C→U	UCC→UUC	S→F	nad4eU27550SF
nad4	27571	132	2	C→U	CCA→CUA	P→L	nad4eU27571PL
nad4	27601	142	2	C→U	UCG→UUG	S→L	nad4eU27601SL
nad4	30350	11	2	C→U	CCG→CUG	P→L	nad4eU30350PL
nad4	30356	13	2	C→U	UCA→UUA	S→L	nad4eU30356SL
nad4	30449	44	2	C→U	UCA→UUA	S→L	nad4eU30449SL
nad4	30469	51	1	C→U	CUC→UUC	L→F	nad4eU30469LF
nad4	30472	52	1	C→U	CCU→UCU	P→S	nad4eU30472PS
nad4	30491	58	2	C→U	UCC→UUC	S→F	nad4eU30491SF
nad4	30512	65	2	C→U	UCA→UUA	S→L	nad4eU30512SL
nad4	30647	110	2	C→U	GCG→GUG	A→V	nad4eU30647AV
nad4	30695	126	2	C→U	CCA→CUA	P→L	nad4eU30695PL
nad4	30713	132	2	C→U	UCC→UUC	S→F	nad4eU30713SF
nad5	31244	49	2	C→U	CCA→CUA	P→L	nad5eU131244PL
nad4	33088	7	1	C→U	CAC→UAC	H→Y	nad4eU33088HY
nad4	33104	12	2	C→U	CCG→CUG	P→L	nad4eU33104PL
nad1	39220	126	1	C→U	CGG→UGG	R→W	nad1eU39220RW
nad1	39288	103	2	C→U	CCG→CUG	P→L	nad1eU39288PL
nad1	39331	89	1	C→U	CGG→UGG	R→W	nad1eU39331RW
nad1	39381	72	2	C→U	UCC→UUC	S→F	nad1eU39381SF
ccmC	40615	225	1	C→U	CCU→UCU	P→S	ccb256eU40615PS
ccmC	40632	219	2	C→U	CCA→CUA	P→L	ccb256eU40632PL
ccmC	40638	217	2	C→U	CCU→CUU	P→L	ccb256eU40638PL
ccmC	40674	205	2	C→U	UCA→UUA	S→L	ccb256eU40674SL
ccmC	40680	203	2	C→U	CCC→CUC	P→L	ccb256eU40680PL
ccmC	40683	202	2	C→U	UCC→UUC	S→F	ccb256eU40683SF
ccmC	40713	192	2	C→U	CCC→CUC	P→L	ccb256eU40713PL
ccmC	40720	190	1	C→U	CCU→UCU	P→S	ccb256eU40720PS
ccmC	40740	183	2	C→U	UCU→UUU	S→F	ccb256eU40740SF
ccmC	40767	174	2	C→U	UCG→UUG	S→L	ccb256eU40767SL
ccmC	40791	166	2	C→U	UCU→UUU	S→F	ccb256eU40791SF
ccmC	40815	158	2	C→U	CCG→CUG	P→L	ccb256eU40815PL
ccmC	40821	156	2	C→U	GCU→GUU	A→V	ccb256eU40821AV
ccmC	40825	155	1	C→U	CGU→UGU	R→C	ccb256eU40825RC
ccmC	40830	153	2	C→U	UCA→UUA	S→L	ccb256eU40830SL
ccmC	40837	151	1	C→U	CCU→UCU	P→S	ccb256eU40837PS
ccmC	40842	149	2	C→U	CCG→CUG	P→L	ccb256eU40842PL
ccmC	40888	134	1	C→U	CUU→UUU	L→F	ccb256eU40888LF
ccmC	40893	132	2	C→U	UCG→UUG	S→L	ccb256eU40893SL
ccmC	40957	111	1	C→U	CGG→UGG	R→W	ccb256eU40957RW
ccmC	40989	100	2	C→U	UCU→UUU	S→F	ccb256eU40989SF
ccmC	41007	94	2	C→U	ACA→AUA	T→I	ccb256eU41007TI
ccmC	41026	88	1	C→U	CGC→UGC	R→C	ccb256eU41026RC
ccmC	41059	77	1	U→C	UUC→CUC	F→L	ccb256eC41059FL
ccmC	41104	62	1	C→U	CGG→UGG	R→W	ccb256eU41104RW
ccmC	41109	60	2	C→U	GCG→GUG	A→V	ccb256eU41109AV
ccmC	41127	54	2	C→U	CCC→CUC	P→L	ccb256eU41127PL
ccmC	41155	45	1	C→U	CUU→UUU	L→F	ccb256eU41155LF
ccmC	41185	35	1	C→U	CAU→UAU	H→Y	ccb256eU41185HY
ccmC	41212	26	1	C→U	CGG→UGG	R→W	ccb256eU41212RW
rpl5	43260	171	2	C→U	CCG→CUG	P→L	rpl5eU43260PL
rpl5	43263	170	2	C→U	CCA→CUA	P→L	rpl5eU43263PL
rpl5	43422	117	2	C→U	UCU→UUU	S→F	rpl5eU43422SF
rpl5	43446	109	2	C→U	CCC→CUC	P→L	rpl5eU43446PL
rpl5	43447	109	1	U→C	UCC→CCC	S→P	rpl5eC43447SP
rpl5	43708	22	1	C→U	CAC→UAC	H→Y	rpl5eU43708HY
rpl5	43725	16	2	C→U	CCG→CUG	P→L	rpl5eU43725PL
rpl5	43737	12	2	C→U	UCA→UUA	S→L	rpl5eU43737SL
nad9	62322	147	1	C→U	CUU→UUU	L→F	nad9eU62322LF
nad9	62363	133	2	C→U	UCA→UUA	S→L	nad9eU62363SL
nad9	62393	123	2	C→U	UCC→UUC	S→F	nad9eU62393SF
nad9	62433	110	1	C→U	CGG→UGG	R→W	nad9eU62433RW
nad9	62463	100	1	C→U	CCG→UCG	P→S	nad9eU62463PS
nad9	62594	56	2	C→U	UCG→UUG	S→L	nad9eU62594SL
nad9	62648	38	2	C→U	CCA→CUA	P→L	nad9eU62648PL
nad9	62669	31	2	C→U	UCU→UUU	S→F	nad9eU62669SF
nad9	62723	13	2	U→C	AUU→ACU	I→T	nad9eC62723IT
ccmB	67037	6	1	C→U	CUU→UUU	L→F	ccb206eU67037LF
ccmB	67049	10	1	C→U	CAU→UAU	H→Y	ccb206eU67049HY
ccmB	67101	27	2	C→U	UCG→UUG	S→L	ccb206eU67101SL
ccmB	67149	43	2	C→U	UCA→UUA	S→L	ccb206eU67149SL
ccmB	67158	46	2	C→U	UCC→UUC	S→F	ccb206eU67158SF
ccmB	67170	50	2	C→U	CCG→CUG	P→L	ccb206eU67170PL
ccmB	67175	52	1	C→U	CGG→UGG	R→W	ccb206eU67175RW
ccmB	67181	54	1	C→U	CCU→UCU	P→S	ccb206eU67181PS
ccmB	67185	55	2	C→U	CCG→CUG	P→L	ccb206eU67185PL
ccmB	67193	58	1	C→U	CCU→UCU	P→S	ccb206eU67193PS
ccmB	67200	60	2	C→U	CCU→CUU	P→L	ccb206eU67200PL
ccmB	67209	63	2	C→U	CCC→CUC	P→L	ccb206eU67209PL
ccmB	67214	65	1	C→U	CCU→UCU	P→S	ccb206eU67214PS
ccmB	67215	65	2	C→U	UCU→UUU	S→F	ccb206eU67215SF
ccmB	67239	73	2	U→C	AUA→ACA	I→T	ccb206eC67239IT
ccmB	67271	84	1	U→C	UUU→CUU	F→L	ccb206eC67271FL
ccmB	67307	96	1	C→U	CGG→UGG	R→W	ccb206eU67307RW
ccmB	67325	102	1	C→U	CGU→UGU	R→C	ccb206eU67325RC
ccmB	67334	105	1	C→U	CGU→UGU	R→C	ccb206eU67334RC
ccmB	67359	113	2	C→U	CCG→CUG	P→L	ccb206eU67359PL
ccmB	67388	123	1	C→U	CGG→UGG	R→W	ccb206eU67388RW
ccmB	67401	127	2	C→U	CCA→CUA	P→L	ccb206eU67401PL
ccmB	67445	142	1	C→U	CGU→UGU	R→C	ccb206eU67445RC
ccmB	67449	143	2	C→U	UCG→UUG	S→L	ccb206eU67449SL
ccmB	67488	156	2	C→U	UCG→UUG	S→L	ccb206eU67488SL
ccmB	67497	159	2	C→U	CCA→CUA	P→L	ccb206eU67497PL
ccmB	67506	162	2	C→U	UCA→UUA	S→L	ccb206eU67506SL
ccmB	67515	165	2	C→U	UCA→UUA	S→L	ccb206eU67515SL
ccmB	67524	168	2	C→U	CCA→CUA	P→L	ccb206eU67524PL
ccmB	67533	171	2	C→U	UCU→UUU	S→F	ccb206eU67533SF
ccmB	67535	172	1	C→U	CGU→UGU	R→C	ccb206eU67535RC
ccmB	67572	184	2	C→U	UCA→UUA	S→L	ccb206eU67572SL
ccmB	67575	185	2	C→U	UCG→UUG	S→L	ccb206eU67575SL
ccmB	67587	189	2	C→U	UCC→UUC	S→F	ccb206eU67587SF
ccmB	67590	190	2	C→U	UCU→UUU	S→F	ccb206eU67590SF
ccmB	67593	191	2	C→U	CCG→CUG	P→L	ccb206eU67593PL
ccmB	67632	204	2	C→U	UCA→UUA	S→L	ccb206eU67632SL
ccmFc	71386	12	2	C→U	ACU→AUU	T→I	ccb452eU71386TI
ccmFc	71389	13	2	C→U	UCC→UUC	S→F	ccb452eU71389SF
ccmFc	71401	17	2	C→U	CCU→CUU	P→L	ccb452eU71401PL
ccmFc	71403	18	1	C→U	CGU→UGU	R→C	ccb452eU71403RC
ccmFc	71454	35	1	C→U	CCC→UCC	P→S	ccb452eU71454PS
ccmFc	71473	41	2	C→U	UCC→UUC	S→F	ccb452eU71473SF
ccmFc	71497	49	2	C→U	CCU→CUU	P→L	ccb452eU71497PL
ccmFc	71502	51	1	C→U	CCU→UCU	P→S	ccb452eU71502PS
ccmFc	71506	52	2	C→U	UCA→UUA	S→L	ccb452eU71506SL
ccmFc	71511	54	1	C→U	CCU→UCU	P→S	ccb452eU71511PS
ccmFc	71748	133	1	C→U	CGU→UGU	R→C	ccb452eU71748RC
ccmFc	71868	173	1	C→U	CCC→UCC	P→S	ccb452eU71868PS
ccmFc	71926	192	2	C→U	UCG→UUG	S→L	ccb452eU71926SL
ccmFc	71950	200	2	C→U	GCG→GUG	A→V	ccb452eU71950AV
ccmFc	72034	228	2	C→U	GCU→GUU	A→V	ccb452eU72034AV
ccmFc	73179	50	1	C→U	CCG→UCG	P→S	ccb452eU73179PS
ccmFc	73243	71	2	C→U	CCA→CUA	P→L	ccb452eU73243PL
ccmFc	73296	89	1	C→U	CGG→UGG	R→W	ccb452eU73296RW
ccmFc	73500	157	1	C→U	CGG→UGG	R→W	ccb452eU73500RW
ccmFc	73584	185	1	U→C	UAA→CAA	*→Q	ccb452eC73584*Q
nad1	75996	2	2	C→U	CCA→CUA	P→L	nad1eU75996PL
nad1	76005	5	2	C→U	UCG→UUG	S→L	nad1eU76005SL
nad1	76007	6	1	C→U	CUC→UUC	L→F	nad1eU76007LF
nad1	76011	7	2	C→U	UCU→UUU	S→F	nad1eU76011SF
nad1	76014	8	2	C→U	CCA→CUA	P→L	nad1eU76014PL
nad1	76026	12	2	C→U	CCG→CUG	P→L	nad1eU76026PL
nad1	76050	20	2	C→U	UCC→UUC	S→F	nad1eU76050SF
nad1	76068	26	2	C→U	UCG→UUG	S→L	nad1eU76068SL
nad1	76094	35	1	C→U	CUC→UUC	L→F	nad1eU76094LF
nad1	76169	60	1	C→U	CGG→UGG	R→W	nad1eU76169RW
nad1	76199	70	1	C→U	CGG→UGG	R→W	nad1eU76199RW
nad2	91056	10	2	C→U	UCC→UUC	S→F	nad2eU91056SF
nad2	91149	41	2	U→C	GUC→GCC	V→A	nad2eC91149VA
nad2	92470	27	1	U→C	UUU→CUU	F→L	nad2eC92470FL
nad2	92509	40	1	C→U	CUU→UUU	L→F	nad2eU92509LF
nad2	92558	56	2	C→U	UCC→UUC	S→F	nad2eU92558SF
nad2	92603	71	2	C→U	CCA→CUA	P→L	nad2eU92603PL
nad2	92608	73	1	C→U	CCU→UCU	P→S	nad2eU92608PS
nad2	92614	75	1	C→U	CGC→UGC	R→C	nad2eU92614RC
nad2	92648	86	2	C→U	UCA→UUA	S→L	nad2eU92648SL
nad2	92675	95	2	C→U	CCU→CUU	P→L	nad2eU92675PL
nad2	92744	118	2	C→U	UCG→UUG	S→L	nad2eU92744SL
atp6-2	106538	3	1	U→C	UAC→CAC	Y→H	atp6-2eC106538YH
atp6-2	106569	13	2	C→U	UCG→UUG	S→L	atp6-2eU106569SL
atp6-2	106616	29	1	U→C	UUU→CUU	F→L	atp6-2eC106616FL
atp6-2	106667	46	1	U→C	UUC→CUC	F→L	atp6-2eC106667FL
atp6-2	106700	57	1	U→C	UUU→CUU	F→L	atp6-2eC106700FL
atp6-2	106740	70	2	C→U	UCA→UUA	S→L	atp6-2eU106740SL
atp6-2	106791	87	2	C→U	CCG→CUG	P→L	atp6-2eU106791PL
atp6-2	106860	110	2	C→U	UCG→UUG	S→L	atp6-2eU106860SL
atp6-2	106878	116	2	C→U	UCG→UUG	S→L	atp6-2eU106878SL
atp6-2	106886	119	1	C→U	CGU→UGU	R→C	atp6-2eU106886RC
atp6-2	107025	165	2	C→U	UCA→UUA	S→L	atp6-2eU107025SL
atp6-2	107084	185	1	C→U	CCU→UCU	P→S	atp6-2eU107084PS
atp6-2	107087	186	1	C→U	CAU→UAU	H→Y	atp6-2eU107087HY
atp6-2	107231	234	1	U→C	UUC→CUC	F→L	atp6-2eC107231FL
cox3	107917	255	2	C→U	CCA→CUA	P→L	cox3eU107917PL
cox3	107927	252	1	C→U	CGG→UGG	R→W	cox3eU107927RW
cox3	108115	189	2	C→U	UCC→UUC	S→F	cox3eU108115SF
cox3	108259	141	2	C→U	CCU→CUU	P→L	cox3eU108259PL
cox3	108262	140	2	C→U	CCC→CUC	P→L	cox3eU108262PL
cox3	108367	105	2	C→U	UCU→UUU	S→F	cox3eU108367SF
cox3	108370	104	2	C→U	UCU→UUU	S→F	cox3eU108370SF
cox3	108377	102	1	C→U	CGG→UGG	R→W	cox3eU108377RW
cox3	108436	82	2	C→U	CCU→CUU	P→L	cox3eU108436PL
atp8	109331	137	1	U→C	UGG→CGG	W→R	atp8eC109331WR
atp8	109346	132	1	U→C	UCU→CCU	S→P	atp8eC109346SP
atp8	109379	121	1	U→C	UUC→CUC	F→L	atp8eC109379FL
atp8	109682	20	1	C→U	CUC→UUC	L→F	atp8eU109682LF
atp8	109693	16	2	C→U	UCA→UUA	S→L	atp8eU109693SL
cox2	111094	24	1	U→C	UAA→CAA	*→Q	cox2eC111094*Q
cox2	111118	16	1	C→U	CGG→UGG	R→W	cox2eU111118RW
cox2	111139	9	1	C→U	CCU→UCU	P→S	cox2eU111139PS
mttB	115813	5	1	U→C	UUU→CUU	F→L	tatCeC115813FL
mttB	115829	10	2	C→U	UCA→UUA	S→L	tatCeU115829SL
mttB	115859	20	2	C→U	CCG→CUG	P→L	tatCeU115859PL
mttB	115933	45	1	C→U	CGU→UGU	R→C	tatCeU115933RC
mttB	115945	49	1	C→U	CCG→UCG	P→S	tatCeU115945PS
mttB	115961	54	2	C→U	UCU→UUU	S→F	tatCeU115961SF
mttB	115964	55	2	C→U	CCA→CUA	P→L	tatCeU115964PL
mttB	116000	67	2	C→U	UCG→UUG	S→L	tatCeU116000SL
mttB	116011	71	1	C→U	CGU→UGU	R→C	tatCeU116011RC
mttB	116021	74	2	C→U	UCA→UUA	S→L	tatCeU116021SL
mttB	116035	79	1	C→U	CCG→UCG	P→S	tatCeU116035PS
mttB	116095	99	1	C→U	CAU→UAU	H→Y	tatCeU116095HY
mttB	116161	121	1	C→U	CUC→UUC	L→F	tatCeU116161LF
mttB	116164	122	1	C→U	CAU→UAU	H→Y	tatCeU116164HY
mttB	116177	126	2	C→U	UCU→UUU	S→F	tatCeU116177SF
mttB	116179	127	1	C→U	CGC→UGC	R→C	tatCeU116179RC
mttB	116186	129	2	C→U	UCC→UUC	S→F	tatCeU116186SF
mttB	116209	137	1	C→U	CCC→UCC	P→S	tatCeU116209PS
mttB	116212	138	1	C→U	CGG→UGG	R→W	tatCeU116212RW
mttB	116240	147	2	C→U	CCA→CUA	P→L	tatCeU116240PL
mttB	116305	169	1	C→U	CAU→UAU	H→Y	tatCeU116305HY
mttB	116338	180	1	C→U	CCA→UCA	P→S	tatCeU116338PS
mttB	116374	192	1	C→U	CGU→UGU	R→C	tatCeU116374RC
mttB	116386	196	1	C→U	CCA→UCA	P→S	tatCeU116386PS
mttB	116411	204	2	C→U	UCC→UUC	S→F	tatCeU116411SF
mttB	116443	215	1	C→U	CCG→UCG	P→S	tatCeU116443PS
mttB	116465	222	2	C→U	UCC→UUC	S→F	tatCeU116465SF
mttB	116500	234	1	C→U	CGU→UGU	R→C	tatCeU116500RC
mttB	116546	249	2	C→U	UCG→UUG	S→L	tatCeU116546SL
mttB	116614	272	1	U→C	UAA→CAA	*→Q	tatCeC116614*Q
mttB	116620	274	1	U→C	UAG→CAG	*→Q	tatCeC116620*Q
matR	117924	2	2	C→U	UCG→UUG	S→L	matReU117924SL
matR	117999	27	2	C→U	UCC→UUC	S→F	matReU117999SF
matR	118092	58	2	C→U	ACC→AUC	T→I	matReU118092TI
matR	118166	83	1	U→C	UUU→CUU	F→L	matReC118166FL
matR	118203	95	2	C→U	UCC→UUC	S→F	matReU118203SF
matR	118293	125	2	C→U	CCA→CUA	P→L	matReU118293PL
matR	118421	168	1	U→C	UCU→CCU	S→P	matReC118421SP
matR	118554	212	2	C→U	CCC→CUC	P→L	matReU118554PL
matR	118614	232	2	C→U	GCC→GUC	A→V	matReU118614AV
matR	118736	273	1	U→C	UUU→CUU	F→L	matReC118736FL
matR	118739	274	1	U→C	UUU→CUU	F→L	matReC118739FL
matR	118841	308	1	U→C	UAU→CAU	Y→H	matReC118841YH
matR	119159	414	1	C→U	CUU→UUU	L→F	matReU119159LF
matR	119370	484	2	U→C	GUG→GCG	V→A	matReC119370VA
matR	119372	485	1	C→U	CCA→UCA	P→S	matReU119372PS
matR	119385	489	2	C→U	GCA→GUA	A→V	matReU119385AV
matR	119634	572	2	C→U	UCC→UUC	S→F	matReU119634SF
matR	119655	579	2	C→U	CCU→CUU	P→L	matReU119655PL
matR	119675	586	1	C→U	CGC→UGC	R→C	matReU119675RC
matR	119711	598	1	C→U	CAC→UAC	H→Y	matReU119711HY
matR	119742	608	2	C→U	CCG→CUG	P→L	matReU119742PL
matR	119781	621	2	C→U	CCA→CUA	P→L	matReU119781PL
matR	119799	627	2	C→U	UCA→UUA	S→L	matReU119799SL
matR	119829	637	2	C→U	ACC→AUC	T→I	matReU119829TI
matR	119873	652	1	U→C	UCC→CCC	S→P	matReC119873SP
matR	119886	656	2	C→U	CCG→CUG	P→L	matReU119886PL
nad6	127205	9	2	C→U	CCU→CUU	P→L	nad6eU127205PL
nad6	127267	30	1	C→U	CCC→UCC	P→S	nad6eU127267PS
nad6	127268	30	2	C→U	UCC→UUC	S→F	nad6eU127268SF
nad6	127274	32	2	C→U	CCA→CUA	P→L	nad6eU127274PL
nad6	127282	35	1	C→U	CGC→UGC	R→C	nad6eU127282RC
nad6	127306	43	1	U→C	UUC→CUC	F→L	nad6eC127306FL
nad6	127340	54	2	C→U	CCA→CUA	P→L	nad6eU127340PL
nad6	127348	57	1	C→U	CAU→UAU	H→Y	nad6eU127348HY
nad6	127370	64	2	C→U	UCA→UUA	S→L	nad6eU127370SL
nad6	127748	190	2	C→U	UCU→UUU	S→F	nad6eU127748SF
nad5	130180	404	1	U→C	UUC→CUC	F→L	nad5eC130180FL
nad5	130257	378	2	U→C	UUA→UCA	L→S	nad5eC130257LS
nad5	130308	361	2	C→U	UCA→UUA	S→L	nad5eU130308SL
nad5	130489	301	1	U→C	UUU→CUU	F→L	nad5eC130489FL
nad5	130755	212	2	U→C	UUU→UCU	F→S	nad5eC130755FS
nad5	130783	203	1	C→U	CCG→UCG	P→S	nad5eU130783PS
nad5	130893	166	2	C→U	UCA→UUA	S→L	nad5eU130893SL
nad5	130905	162	2	C→U	UCG→UUG	S→L	nad5eU130905SL
nad5	130942	150	1	C→U	CUU→UUU	L→F	nad5eU130942LF
nad5	130975	139	1	U→C	UUU→CUU	F→L	nad5eC130975FL
nad5	130989	134	2	C→U	UCU→UUU	S→F	nad5eU130989SF
nad5	131010	127	2	C→U	GCC→GUC	A→V	nad5eU131010AV
nad5	131070	107	2	C→U	UCG→UUG	S→L	nad5eU131070SL
nad5	131079	104	2	C→U	CCU→CUU	P→L	nad5eU131079PL
nad5	131220	57	2	C→U	UCU→UUU	S→F	nad5eU131220SF
nad5	131259	44	2	C→U	UCU→UUU	S→F	nad5eU131259SF
nad5	131346	15	2	U→C	UUC→UCC	F→S	nad5eC131346FS
nad5	131376	5	2	C→U	CCG→CUG	P→L	nad5eU131376PL
nad5	132235	77	1	U→C	UUU→CUU	F→L	nad5eC132235FL
nad5	132309	52	2	C→U	CCG→CUG	P→L	nad5eU132309PL
atp1	147502	507	1	U→C	UAG→CAG	*→Q	atp1eC147502*Q
atp1	147517	502	1	U→C	UGU→CGU	C→R	atp1eC147517CR
atp1	148356	222	2	U→C	AUU→ACU	I→T	atp1eC148356IT
nad2	160124	39	2	U→C	UUU→UCU	F→S	nad2eC160124FS
nad2	161621	7	1	U→C	UAU→CAU	Y→H	nad2eC161621YH
nad2	161703	34	2	C→U	UCU→UUU	S→F	nad2eU161703SF
nad2	161715	38	2	C→U	UCA→UUA	S→L	nad2eU161715SL
nad2	161724	41	2	C→U	UCU→UUU	S→F	nad2eU161724SF
nad2	161843	81	1	C→U	CAU→UAU	H→Y	nad2eU161843HY
nad2	161873	91	1	C→U	CGU→UGU	R→C	nad2eU161873RC
nad2	161943	114	2	C→U	UCA→UUA	S→L	nad2eU161943SL
nad2	161973	124	2	C→U	UCA→UUA	S→L	nad2eU161973SL
nad2	162078	159	2	U→C	GUA→GCA	V→A	nad2eC162078VA
nad2	162191	197	1	C→U	CGU→UGU	R→C	nad2eU162191RC
nad2	162505	15	1	U→C	UCU→CCU	S→P	nad2eC162505SP
nad2	162538	26	1	U→C	UAA→CAA	*→Q	nad2eC162538*Q
nad2	162550	30	1	U→C	UAG→CAG	*→Q	nad2eC162550*Q
nad2	162604	48	1	U→C	UAA→CAA	*→Q	nad2eC162604*Q
nad2	162670	70	1	U→C	UAA→CAA	*→Q	nad2eC162670*Q
nad2	163653	7	2	C→U	GCG→GUG	A→V	nad2eU163653AV
nad2	163743	37	2	C→U	UCU→UUU	S→F	nad2eU163743SF
nad2	163755	41	2	C→U	UCA→UUA	S→L	nad2eU163755SL
nad2	163760	43	1	U→C	UUU→CUU	F→L	nad2eC163760FL
nad2	163764	44	2	C→U	CCA→CUA	P→L	nad2eU163764PL
nad2	163812	60	2	C→U	UCA→UUA	S→L	nad2eU163812SL
nad4L	186176	1	2	C→U	ACG→AUG	T→M	nad4LeU186176TM
nad4L	186182	3	2	C→U	CCU→CUU	P→L	nad4LeU186182PL
nad4L	186215	14	2	C→U	UCU→UUU	S→F	nad4LeU186215SF
nad4L	186221	16	2	C→U	UCA→UUA	S→L	nad4LeU186221SL
nad4L	186229	19	1	C→U	CGG→UGG	R→W	nad4LeU186229RW
nad4L	186260	29	2	C→U	CCU→CUU	P→L	nad4LeU186260PL
nad4L	186269	32	2	C→U	UCA→UUA	S→L	nad4LeU186269SL
nad4L	186274	34	1	C→U	CCA→UCA	P→S	nad4LeU186274PS
nad4L	186284	37	2	C→U	UCA→UUA	S→L	nad4LeU186284SL
nad4L	186332	53	2	C→U	UCG→UUG	S→L	nad4LeU186332SL
nad4L	186362	63	2	C→U	UCA→UUA	S→L	nad4LeU186362SL
nad4L	186371	66	2	C→U	UCA→UUA	S→L	nad4LeU186371SL
nad4L	186455	94	2	C→U	UCU→UUU	S→F	nad4LeU186455SF
atp4	186657	3	1	U→C	UCU→CCU	S→P	atp4eC186657SP
atp4	186658	3	2	C→U	CCU→CUU	P→L	atp4eU186658PL
atp4	186721	24	2	C→U	UCA→UUA	S→L	atp4eU186721SL
atp4	186739	30	2	C→U	UCA→UUA	S→L	atp4eU186739SL
atp4	186865	72	2	C→U	UCG→UUG	S→L	atp4eU186865SL
atp4	186898	83	2	C→U	CCU→CUU	P→L	atp4eU186898PL
atp4	186901	84	2	C→U	CCG→CUG	P→L	atp4eU186901PL
atp4	187017	123	1	U→C	UUC→CUC	F→L	atp4eC187017FL
atp4	187045	132	2	C→U	UCA→UUA	S→L	atp4eU187045SL
atp4	187066	139	2	C→U	ACU→AUU	T→I	atp4eU187066TI
atp4	187086	146	1	C→U	CUU→UUU	L→F	atp4eU187086LF
atp4	187113	155	1	C→U	CAC→UAC	H→Y	atp4eU187113HY
atp4	187120	157	2	C→U	UCA→UUA	S→L	atp4eU187120SL
atp4	187138	163	2	U→C	GUC→GCC	V→A	atp4eC187138VA
atp4	187153	168	2	U→C	UUG→UCG	L→S	atp4eC187153LS
atp4	187159	170	2	U→C	GUU→GCU	V→A	atp4eC187159VA
atp4	187173	175	1	C→U	CUC→UUC	L→F	atp4eU187173LF
rpl16	189257	2	2	C→U	UCG→UUG	S→L	rpl16eU189257SL
rpl16	189540	42	1	C→U	CGU→UGU	R→C	rpl16eU189540RC
rpl16	189560	35	2	C→U	ACU→AUU	T→I	rpl16eU189560TI
rps3	189726	512	2	C→U	UCU→UUU	S→F	rps3eU189726SF
rps3	189735	509	2	C→U	GCG→GUG	A→V	rps3eU189735AV
rps3	189772	497	1	C→U	CGU→UGU	R→C	rps3eU189772RC
rps3	189777	495	2	U→C	AUA→ACA	I→T	rps3eC189777IT
rps3	189787	492	1	U→C	UAU→CAU	Y→H	rps3eC189787YH
rps3	189825	479	2	C→U	UCA→UUA	S→L	rps3eU189825SL
rps3	189966	432	2	C→U	CCG→CUG	P→L	rps3eU189966PL
rps3	190171	364	1	U→C	UUC→CUC	F→L	rps3eC190171FL
rps3	190228	345	1	U→C	UGG→CGG	W→R	rps3eC190228WR
rps3	190299	321	2	C→U	CCA→CUA	P→L	rps3eU190299PL
rps3	190440	274	2	C→U	UCG→UUG	S→L	rps3eU190440SL
rps3	190533	243	2	U→C	GUG→GCG	V→A	rps3eC190533VA
rps3	190617	215	2	C→U	UCG→UUG	S→L	rps3eU190617SL
rps3	190633	210	1	U→C	UCU→CCU	S→P	rps3eC190633SP
rps3	190666	199	1	C→U	CAU→UAU	H→Y	rps3eU190666HY
rps3	190708	185	1	U→C	UUC→CUC	F→L	rps3eC190708FL
rps3	190818	148	2	C→U	UCA→UUA	S→L	rps3eU190818SL
rps3	190848	138	2	C→U	UCA→UUA	S→L	rps3eU190848SL
rps3	191022	80	2	U→C	GUC→GCC	V→A	rps3eC191022VA
rps3	192837	22	2	C→U	UCG→UUG	S→L	ArthMp062eU192837SL
rps3	192871	11	1	U→C	UAA→CAA	*→Q	ArthMp062eC192871*Q
rps4	193399	313	1	C→U	CGG→UGG	R→W	rps4eU193399RW
rps4	193413	308	2	C→U	CCA→CUA	P→L	rps4eU193413PL
rsp4	193464	291	2	C→U	UCU→UUU	S→F	rps4eU193464SF
rps4	193489	283	1	C→U	CAU→UAU	H→Y	rps4eU193489HY
rps4	193500	279	2	C→U	UCG→UUG	S→L	rps4eU193500SL
rps4	193549	263	1	U→C	UUU→CUU	F→L	rps4eC193549FL
rps4	193566	257	2	C→U	UCC→UUC	S→F	rps4eU193566SF
rps4	193687	217	1	U→C	UUC→CUC	F→L	rps4eC193687FL
rps4	193696	214	1	U→C	UUU→CUU	F→L	rps4eC193696FL
rps4	193899	146	2	C→U	ACC→AUC	T→I	rps4eU193899TI
rps4	193956	127	2	U→C	AUU→ACU	I→T	rps4eC193956IT
rps4	194004	111	2	C→U	CCG→CUG	P→L	rps4eU194004PL
rps4	194038	100	1	C→U	CAU→UAU	H→Y	rps4eU194038HY
rps4	194073	88	2	C→U	CCA→CUA	P→L	rps4eU194073PL
rps4	194143	65	1	C→U	CAU→UAU	H→Y	rps4eU194143HY
rps4	194149	63	1	C→U	CUU→UUU	L→F	rps4eU194149LF
rps4	194172	55	2	C→U	UCA→UUA	S→L	rps4eU194172SL
rps4	194332	2	1	C→U	CCU→UCU	P→S	rps4eU194332PS
nad5	205135	8	2	C→U	CCC→CUC	P→L	nad5eU205135PL
nad5	205137	9	1	U→C	UUC→CUC	F→L	nad5eC205137FL
nad5	205195	28	2	C→U	ACC→AUC	T→I	nad5eU205195TI
nad5	205213	34	2	C→U	CCG→CUG	P→L	nad5eU205213PL
nad5	205225	38	2	C→U	UCA→UUA	S→L	nad5eU205225SL
nad5	205234	41	2	C→U	UCU→UUU	S→F	nad5eU205234SF
nad5	205254	48	1	U→C	UCC→CCC	S→P	nad5eC205254SP
nad5	206594	11	2	C→U	UCA→UUA	S→L	nad5eU206594SL
nad5	206615	18	2	C→U	UCU→UUU	S→F	nad5eU206615SF
nad5	206617	19	1	C→U	CGU→UGU	R→C	nad5eU206617RC
nad5	206657	32	2	C→U	UCG→UUG	S→L	nad5eU206657SL
nad7	210007	120	2	C→U	UCU→UUU	S→F	nad7eU210007SF
nad7	210049	106	2	C→U	CCA→CUA	P→L	nad7eU210049PL
nad7	210070	99	2	C→U	UCU→UUU	S→F	nad7eU210070SF
nad7	210116	84	1	C→U	CGU→UGU	R→C	nad7eU210116RC
nad7	210229	46	2	C→U	CCU→CUU	P→L	nad7eU210229PL
nad7	210353	5	1	U→C	UAG→CAG	*→Q	nad7eC210353*Q
nad7	211745	186	1	C→U	CGC→UGC	R→C	nad7eU211745RC
nad7	211774	176	2	C→U	UCU→UUU	S→F	nad7eU211774SF
nad7	211775	176	1	C→U	CCU→UCU	P→S	nad7eU211775PS
nad7	211790	171	1	C→U	CAU→UAU	H→Y	nad7eU211790HY
nad7	211835	156	1	U→C	UCA→CCA	S→P	nad7eC211835SP
nad7	211936	122	2	C→U	UCA→UUA	S→L	nad7eU211936SL
nad7	212131	57	2	C→U	UCA→UUA	S→L	nad7eU212131SL
nad7	212170	44	2	C→U	UCA→UUA	S→L	nad7eU212170SL
nad7	212179	41	2	C→U	UCA→UUA	S→L	nad7eU212179SL
nad7	212198	35	1	C→U	CGU→UGU	R→C	nad7eU212198RC
nad7	212263	13	2	C→U	UCA→UUA	S→L	nad7eU212263SL
nad7	212270	11	1	C→U	CAU→UAU	H→Y	nad7eU212270HY
nad7	213646	32	2	C→U	UCU→UUU	S→F	nad7eU213646SF
nad7	213706	12	2	C→U	CCG→CUG	P→L	nad7eU213706PL
nad7	214570	49	1	U→C	UGC→CGC	C→R	nad7eC214570CR
nad7	214578	46	2	C→U	UCA→UUA	S→L	nad7eU214578SL
nad7	214638	26	2	C→U	UCA→UUA	S→L	nad7eU214638SL
cox3	216811	255	2	C→U	CCA→CUA	P→L	cox3eU216811PL
cox3	216821	252	1	C→U	CGG→UGG	R→W	cox3eU216821RW
cox3	217009	189	2	C→U	UCC→UUC	S→F	cox3eU217009SF
cox3	217153	141	2	C→U	CCU→CUU	P→L	cox3eU217153PL
cox3	217156	140	2	C→U	CCC→CUC	P→L	cox3eU217156PL
cox3	217261	105	2	C→U	UCU→UUU	S→F	cox3eU217261SF
cox3	217264	104	2	C→U	UCU→UUU	S→F	cox3eU217264SF
cox3	217271	102	1	C→U	CGG→UGG	R→W	cox3eU217271RW
cox3	217330	82	2	C→U	CCU→CUU	P→L	cox3eU217330PL
atp8	218225	137	1	U→C	UGG→CGG	W→R	atp8eC218225WR
atp8	218240	132	1	U→C	UCU→CCU	S→P	atp8eC218240SP
atp8	218273	121	1	U→C	UUC→CUC	F→L	atp8eC218273FL
atp8	218576	20	1	C→U	CUC→UUC	L→F	atp8eU218576LF
atp8	218587	16	2	C→U	UCA→UUA	S→L	atp8eU218587SL
cox2	219988	24	1	U→C	UAA→CAA	*→Q	cox2eC219988*Q
cox2	220012	16	1	C→U	CGG→UGG	R→W	cox2eU220012RW
cox2	220033	9	1	C→U	CCU→UCU	P→S	cox2eU220033PS
cox2	224197	211	2	C→U	UCG→UUG	S→L	cox2eU224197SL
cox2	224206	208	2	C→U	ACC→AUC	T→I	cox2eU224206TI
cox2	224272	186	2	C→U	CCU→CUU	P→L	cox2eU224272PL
cox2	224285	182	1	C→U	CCU→UCU	P→S	cox2eU224285PS
cox2	224353	159	2	C→U	UCA→UUA	S→L	cox2eU224353SL
cox2	224368	154	2	C→U	CCA→CUA	P→L	cox2eU224368PL
cox2	224386	148	2	C→U	ACG→AUG	T→M	cox2eU224386TM
cox2	224656	58	2	C→U	GCU→GUU	A→V	cox2eU224656AV
cox2	224668	54	2	C→U	UCG→UUG	S→L	cox2eU224668SL
cox2	224681	50	1	U→C	UUU→CUU	F→L	cox2eC224681FL
cox2	224758	24	2	C→U	UCU→UUU	S→F	cox2eU224758SF
cox2	224804	9	1	C→U	CUC→UUC	L→F	cox2eU224804LF
nad1	233026	5	2	C→U	UCU→UUU	S→F	nad1eU233026SF
nad1	233061	17	1	C→U	CCU→UCU	P→S	nad1eU233061PS
nad1	234371	8	1	C→U	CCC→UCC	P→S	nad1eU234371PS
nad1	234374	9	1	C→U	CGU→UGU	R→C	nad1eU234374RC
nad1	234381	11	2	C→U	UCG→UUG	S→L	nad1eU234381SL
nad1	234417	23	2	C→U	UCC→UUC	S→F	nad1eU234417SF
nad1	234461	38	1	C→U	CGU→UGU	R→C	nad1eU234461RC
nad1	234516	56	2	C→U	UCA→UUA	S→L	nad1eU234516SL
nad1	234642	98	2	C→U	ACU→AUU	T→I	nad1eU234642TI
nad1	234645	99	2	C→U	UCA→UUA	S→L	nad1eU234645SL
nad1	234653	102	1	U→C	UCG→CCG	S→P	nad1eC234653SP
atp9	254957	82	2	C→U	UCA→UUA	S→L	atp9eU254957SL
ccmFn	278690	137	2	C→U	CCU→CUU	P→L	ccb382eU278690PL
ccmFn	278770	164	1	C→U	CGU→UGU	R→C	ccb382eU278770RC
ccmFn	278870	197	2	C→U	UCC→UUC	S→F	ccb382eU278870SF
ccmFn	278945	222	2	U→C	UUU→UCU	F→S	ccb382eC278945FS
ccmFn	278998	240	1	C→U	CCU→UCU	P→S	ccb382eU278998PS
ccmFn	278999	240	2	C→U	UCU→UUU	S→F	ccb382eU278999SF
ccmFn	279008	243	2	C→U	UCA→UUA	S→L	ccb382eU279008SL
ccmFn	279046	256	1	C→U	CGU→UGU	R→C	ccb382eU279046RC
ccmFn	279068	263	2	C→U	UCA→UUA	S→L	ccb382eU279068SL
ccmFn	279080	267	2	C→U	CCA→CUA	P→L	ccb382eU279080PL
ccmFn	279095	272	2	C→U	UCA→UUA	S→L	ccb382eU279095SL
ccmFn	279203	308	2	U→C	CUA→CCA	L→P	ccb382eC279203LP
ccmFn	279241	321	1	U→C	UUU→CUU	F→L	ccb382eC279241FL
ccmFn	279244	322	1	C→U	CGC→UGC	R→C	ccb382eU279244RC
ccmFn	279251	324	2	U→C	GUU→GCU	V→A	ccb382eC279251VA
ccmFn	279356	359	2	U→C	CUG→CCG	L→P	ccb382eC279356LP
ccmFn	279397	373	1	C→U	CUC→UUC	L→F	ccb382eU279397LF
ccmFn	279562	50	1	C→U	CGG→UGG	R→W	ccb203eU279562RW
ccmFn	279590	59	2	C→U	CCA→CUA	P→L	ccb203eU279590PL
ccmFn	279607	65	1	C→U	CAU→UAU	H→Y	ccb203eU279607HY
ccmFn	279622	70	1	C→U	CGG→UGG	R→W	ccb203eU279622RW
ccmFn	279640	76	1	C→U	CGG→UGG	R→W	ccb203eU279640RW
ccmFn	279673	87	1	C→U	CGG→UGG	R→W	ccb203eU279673RW
ccmFn	279715	101	1	C→U	CUU→UUU	L→F	ccb203eU279715LF
ccmFn	279733	107	1	U→C	UCC→CCC	S→P	ccb203eC279733SP
ccmFn	279734	107	2	C→U	CCC→CUC	P→L	ccb203eU279734PL
ccmFn	279758	115	2	C→U	CCA→CUA	P→L	ccb203eU279758PL
ccmFn	279770	119	2	C→U	UCA→UUA	S→L	ccb203eU279770SL
ccmFn	279805	131	1	C→U	CCC→UCC	P→S	ccb203eU279805PS
ccmFn	279881	156	2	C→U	UCU→UUU	S→F	ccb203eU279881SF
rps12	291067	95	2	C→U	UCC→UUC	S→F	rps12eU291067SF
rps12	291130	74	2	C→U	UCG→UUG	S→L	rps12eU291130SL
rps12	291155	66	1	C→U	CAC→UAC	H→Y	rps12eU291155HY
rps12	291247	35	2	C→U	CCG→CUG	P→L	rps12eU291247PL
nad3	291407	118	1	C→U	CGG→UGG	R→W	nad3eU291407RW
nad3	291412	116	2	C→U	UCG→UUG	S→L	nad3eU291412SL
nad3	291439	107	2	C→U	UCU→UUU	S→F	nad3eU291439SF
nad3	291481	93	2	C→U	UCU→UUU	S→F	nad3eU291481SF
nad3	291490	90	2	C→U	CCC→CUC	P→L	nad3eU291490PL
nad3	291505	85	2	C→U	CCC→CUC	P→L	nad3eU291505PL
nad3	291509	84	1	C→U	CCU→UCU	P→S	nad3eU291509PS
nad3	291526	78	2	C→U	UCC→UUC	S→F	nad3eU291526SF
nad3	291541	73	2	C→U	CCG→CUG	P→L	nad3eU291541PL
nad3	291547	71	2	C→U	UCU→UUU	S→F	nad3eU291547SF
nad3	291610	50	2	C→U	UCC→UUC	S→F	nad3eU291610SF
nad3	291632	43	1	C→U	CAC→UAC	H→Y	nad3eU291632HY
nad3	291676	28	2	C→U	CCA→CUA	P→L	nad3eU291676PL
nad3	291694	22	2	C→U	CCA→CUA	P→L	nad3eU291694PL
nad3	291712	16	2	C→U	UCG→UUG	S→L	nad3eU291712SL
nad3	291751	3	2	C→U	CCC→CUC	P→L	nad3eU291751PL
nad3	291752	3	1	U→C	UCC→CCC	S→P	nad3eC291752SP
cob	294315	367	1	U→C	UUC→CUC	F→L	cobeC294315FL
cob	294327	363	1	U→C	UUU→CUU	F→L	cobeC294327FL
cob	294330	362	1	C→U	CCU→UCU	P→S	cobeU294330PS
cob	294399	339	1	C→U	CGC→UGC	R→C	cobeU294399RC
cob	294432	328	1	C→U	CAC→UAC	H→Y	cobeU294432HY
cob	294506	303	2	C→U	UCA→UUA	S→L	cobeU294506SL
cob	294561	285	1	C→U	CAU→UAU	H→Y	cobeU294561HY
cob	294846	190	1	C→U	CAU→UAU	H→Y	cobeU294846HY
cob	295056	120	1	C→U	CGG→UGG	R→W	cobeU295056RW
cob	295089	109	1	C→U	CAU→UAU	H→Y	cobeU295089HY
cob	295116	100	1	C→U	CAC→UAC	H→Y	cobeU295116HY
cob	295296	40	1	U→C	UCG→CCG	S→P	cobeC295296SP
cox2	297736	24	1	U→C	UAA→CAA	*→Q	cox2eC297736*Q
cox2	297760	16	1	C→U	CGG→UGG	R→W	cox2eU297760RW
cox2	297781	9	1	C→U	CCU→UCU	P→S	cox2eU297781PS
rps14	43306	83	2	C→U	UCC→UUC	S→F	rps14eU43306F
rps13	231756	19	2	C→U	UCA→UUA	S→L	rps13eU56SL
rps13	231790	27	2	U→C	CUU→CCU	L→P	rps13eC80LP
rps13	231833	34	1	C→U	CGU→UGU	R→C	rps13eU100RC
rps13	231898	91	1	C→U	CGU→UGU	R→C	rps13eU271RC
rps13	231877	96	2	C→U	UCG→UUG	S→L	rps13eU287SL
sdh4	107632	10	2	C→U	UCG→UUG	S→L	sdh4eU29SL
sdh4	107685	51	1	U→C	UUC→CUC	F→L	sdh4eC151FL
sdh4	107801	52	2	C→U	CCA→CUA	P→L	sdh4eU155PL
sdh4	107866	59	1	U→C	UAA→CAA	*→Q	sdh4eC175*Q
sdh4	107922	68	2	C→U	CCA→CUA	P→L	sdh4eU203PL
sdh4	107985	87	1	C→U	CAU→UAU	H→Y	sdh4eU259HY
sdh4	707951	103	1	U→C	UUC→CUC	F→L	sdh4eC307FL
sdh4	107958	116	1	U→C	UUU→CUU	F→L	sdh4eC346FL
sdh4	107966	119	1	U→C	UGA→CGA	*→R	sdh4eC355*R
rps10	124352	1	2	C→U	ACG→AUG	T→M	rps10eU2TM
rps10	124336	80	1	C→U	CGG→UGG	R→W	rps10eU238RW
rps10	125757	111	1	C→U	CGA→UGA	R→*	rps10eU331R*
